# Supplementary material for: The mTERF protein MOC1 terminates mitochondrial DNA transcription in the unicellular green alga Chlamydomonas reinhardtii
Source: PubMed Central journal article supplement — Nucleic Acids Res. 2013 May 6;41(13):6553–67. doi: 10.1093/nar/gkt313 (PMC3711419; doi:10.1093/nar/gkt313), 2013-05-06
Supplement: supp_gkt313_nar-02981-c-2012-File002.pdf [file supp_gkt313_nar-02981-c-2012-File002.pdf]

## SUPPLEMENTARY MATERIAL

| name                                                        | sequence 5' to 3' (fw / rev) [5'-modification]             |
|-------------------------------------------------------------|------------------------------------------------------------|
| Primers used for cloning                                    |                                                            |
| MOC1-MTS_A fw / rev                                         | ggatccagctacaccactgggagcag / gaattcctacgcggcgctaaagctcttg  |
| MOC1Ex fw / rev                                             | acgggatcccagcagcagttgtaccgcc / ccgtaagcttctagttgcgcccatgc  |
| Primers used for EMSA probe generation by PCR (EMSA screen) |                                                            |
| Probe 1 (1-542) Cy for / rev                                | actacgcatgcctaagtgc [Cy-3] / ttttgattgacacactttttaca       |
| Probe 2 (518-1061) for / Cy rev                             | tgtaaaaagtgtgcaatgcaaaa / aggtgttaacagccaaagcag [Cy-3]     |
| Probe 3 (1035-1594) Cy for / rev                            | attaggctgctttggctgtt [Cy-3] / ggttctctagctggatgatgc        |
| Probe 4 (1573-2125) for / Cy rev                            | gcatcataccagctagagaacca / gcttcttgatgattgctcacg [Cy-3]     |
| Probe 5 (2104-2646) Cy for / rev                            | ccgtgagcaatcatcaagaa [Cy-3] / gattggccgtgctccttac          |
| Probe 6 (2628-3179) for / Cy rev                            | gtaaggagcacggccaatc / ctgagcagccatacgaacg [Cy-3]           |
| Probe 7 (3157-3704) Cy for / rev                            | cctacgcttcgatggctgt [Cy-3] / caccactaagtgttctctatcagtcg    |
| Probe 8 (3679-4226) for / Cy rev                            | caaccataaagcactgatagaacaa / cgctactctggctactgctg [Cy-3]    |
| Probe 9 (4203-4742) Cy for / rev                            | acaccagcagtaccagagt [Cy-3] / tgccggttgacttttaact           |
| Probe 10 (4699-5239) for / Cy rev                           | ccatgttggcggtagtagg / caatagcatgataataaccgtgacc [Cy-3]     |
| Probe 11 (5216-5755) Cy for / rev                           | ggtcacggtattatcatgctattgt [Cy-3] / gacctcagggtgaccaaaga    |
| Probe 12 (5733-6284) for / Cy rev                           | ggttctttggcaccctgag / caccaatgaatagcaaccagaa [Cy-3]        |
| Probe 13 (6260-6799) Cy for / rev                           | cacttctggttctattcattgg [Cy-3] / gatgtggcgaagacacat         |
| Probe 14 (6780-7330) for / Cy rev                           | atgtgtctttggccacatc / ccaagaagaagcccagaaag [Cy-3]          |
| Probe 15 (7305-7860) Cy for / rev                           | tgttcactttctggcttctt [Cy-3] / cccacctaataacgaatggt         |
| Probe 16 (7834-8385) for / Cy rev                           | ggttaaaccattcgttatttagtg / tcaaaccaggctgttcaaa [Cy-3]      |
| Probe 17 (8366-8910) Cy for / rev                           | tttgaacagcctggtttga [Cy-3] / tgagccagcaccaaaactcta         |
| Probe 18 (8891-9450) for / Cy rev                           | tagagttggctgctgctca / tgcagtagcgttataaaaaagtaa [Cy-3]      |
| Probe 19 (9428-9978) Cy for / rev                           | ttttataataaccgctactgcaaacc [Cy-3] / tcccagaaaagcttgaggat   |
| Probe 20 (9956-10490) for / Cy rev                          | tcttatcctaagcttttctgg / cagaacggctgtagcaagc [Cy-3]         |
| Probe 21 (10464-11010) Cy for / rev                         | ccggtatcagtggcttgcta [Cy-3] / agcgtactcggcgataaaga         |
| Probe 22 (10990-11530) for / Cy rev                         | ccctattctttatcgccgagt / ttacctgaatagatttcgaga [Cy-3]       |
| Probe 23 (11500-12094) Cy for / rev                         | ggtttctgcaaatctattca [Cy-3] / gcatgatgggtaccaaaacc         |
| Probe 24 (12030-12569) for / Cy rev                         | ggtttggtaccatcatgc / aactagcagctgggtggttg [Cy-3]           |
| Probe 25 (12538-13086) Cy for / rev                         | ctgtaaagctacaacaccacca [Cy-3] / aagccttctgctgacaaaga       |
| Probe 26 (13064-13604) for / Cy rev                         | ttctatcttctgacgcaaggg / tcaccaggcgttatagattga [Cy-3]       |
| Probe 27 (13582-14131) Cy for / rev                         | tcaaatctataacgcctggtg [Cy-3] / tgctcgaccgttcagaaaaac       |
| Probe 28 (14100-14668) for / Cy rev                         | ggtctttgccacgttttctg / tgccaaaaggcataaataggtt [Cy-3]       |
| Probe 29 (14641-15194) Cy for / rev                         | tgcaaaaacctattatgcctt [Cy-3] / gctttgcgtaaatctgtgga        |
| Probe 30 (15153-end) for / Cy rev                           | cactgccgatcactatggaa / actacgcatgcctaagtgc [Cy-3]          |
| Primers used for EMSA probe generation by PCR               |                                                            |
| SELEX-S3 long fw / rev                                      | ttttatgaattgtttgtaacacc / cctccgaatattaccaacg [Cy-3]       |
| S2/nd1 Cy3 for / rev                                        | tgaaccagcagtggtgaat / catagcgcgctcaacaaaa [Cy-3]           |
| LHCBM6 NG Cy3 for                                           | gacaaggccttgagagtg [Cy-3]                                  |
| LHCBM6 NG long rev                                          | acgacatagcaaggctcacc                                       |
| LHCBM6 NG short rev                                         | acccatattgacgatgcaca                                       |
| Small oligonucleotide probes for EMSA                       |                                                            |
| S3_1 / S3_1 rc                                              | aattgtttgtaacaccccccaag / cttggggggtgttcacaaacaatt [Cy-3]  |
| S3_2 / S3_2 rc                                              | cgttaatggtgaacactttaaacg / cgtttaaagtgttcaccattaacg [Cy-3] |
| S3_2 Mut / S3_2 Mut rc                                      | cgttaatgagtagccatttaaacg / cgtttaaagtgttactcattaacg [Cy-3] |
| S3_1 Mut I / S3_1 Mut I rc                                  | aattgtttgcaacaccccccaag / cttggggggtgttcgcaacaatt [Cy-3]   |
| S3_1 Mut II / S3_1 Mut II rc                                | aattgtttgtaacaccccccaag / cttggggggtgttcacaaacaatt [Cy-3]  |
| S3_1 Mut III / S3_1 Mut III rc                              | aattgttttgaacaccccccaag [Cy-3] / cttggggggtgttcacaaacaatt  |
| S3_1 Mut IV / S3_1 Mut IV rc                                | aattgtttctgaacaccccccaag [Cy-3] / cttggggggtgttcagaaacaatt |
| S3_1 Mut V / S3_1 Mut V rc                                  | aattgtttgtaacaccccccaag [Cy-3] / cttggggggtgttcacaaacaatt  |
| S3_1 Mut VI / S3_1 Mut VI rc                                | aattgtttgtaacaccccccaag [Cy-3] / cttggggggtgttcacaaacaatt  |
| S3_1 Mut VII / S3_1 Mut VII rc                              | aattgtttgtaacaccccccaag [Cy-3] / cttggggggtgttcacaaacaatt  |
| S3_1 Mut VIII / S3_1 Mut VIII rc                            | aattgtttgtaacaccccccaag [Cy-3] / cttggggggtgttcacaaacaatt  |
| S3_1 Mut IX / S3_1 Mut IX rc                                | aattgtttgtaacaccccccaag [Cy-3] / cttggggggtgttcacaaacaatt  |
| S3_1 Mut X / S3_1 Mut X rc                                  | aattgtttgtaacaccccccaag [Cy-3] / cttggggggtgttcacaaacaatt  |
| S3_1 Mut XI / S3_1 Mut XI rc                                | aattgtttgtaacaccccccaag [Cy-3] / cttggggggtgttcacaaacaatt  |
| S3_1 Mut XII / S3_1 Mut XII rc                              | aattgtttgtaacaccccccaag [Cy-3] / cttggggggtgttcacaaacaatt  |
| CAST (Cyclic amplification and selection of targets)        |                                                            |
| oligonucleotide template                                    | aagctttgaccatgcagc-(n) <sub>20</sub> -cgtctagcatatggatcc   |
| SELEX Cy-3 fw / rev                                         | aagctttgaccatgcagc / ggatccatagctagacg                     |

| Q-PCR (relative mtDNA content)     |                                                    |
|------------------------------------|----------------------------------------------------|
| Chlamy nd1 fw / rev                | acgcgaccattgatctac / agcgaagaacagggcagtaa          |
| TBP for / rev                      | tgccacgttcaaggagtta / tgctcatgcggtagatgag          |
| RT-Q-PCR (processed transcripts)   |                                                    |
| CYN19-3 fw / rev                   | gccaacccttggtctact / gaagttctccgcagtcttg           |
| Chlamy cob fw / rev                | gcctaccactccaatgaa / gtgagcgtaacgcaagatca          |
| Chlamy nd4 fw / rev                | aactatggccggttcttg / cactaccagcagttggagca          |
| Chlamy nd5 fw / rev                | ccccattgctcgttttcta / ccggtaacggtgaatagcat         |
| Chlamy cox1 fw / rev               | tggtaatgccagccctattc / taagcgtccaaccagtacc         |
| Chlamy nd2 fw / rev                | ccaccattgcaggttctt / gcaggcagaggttagagtgg          |
| Chlamy nd6 fw / rev                | tatttgtgtgctgcttgc / tagctcagtggtggatct            |
| Chlamy rtl fw / rev                | ctgccctgcttctaattggag / taccaaaaaccaggacggaag      |
| Chlamy L7 fw / rev                 | cgacagcactggttaccac / acgccaattaacgcaaggg          |
| Chlamy L8 fw / rev                 | ttcagaccgtgtagacag / ggggtcattcggtgttattg          |
| Chlamy L3 fw / rev                 | aacgtctattggaccgaaa / gatttcgcagaaaaccagcta        |
| Chlamy L6 fw / rev                 | aacgttctggaacaattacgc / aaccgtattcactggtttatgc     |
| Chlamy L5 fw / rev                 | ttgtcataggcgggcttc / tctcgttgaacaccagaac           |
| Chlamy S3 fw / rev                 | ctatcgctgccaattgctt / gcttcaacgcgtaagtttg          |
| Chlamy S4 fw / rev                 | tggtatccaactgtgggtgt / ttgcattgctgaaaagttcg        |
| RT-Q-PCR (unprocessed transcripts) |                                                    |
| nd4-cob fw / rev                   | ccattgctaattggtgctgt / ttcatggagttgggtaggc         |
| nd4-nd5 fw / rev                   | cggttgctaaagcgttgga / gcaaaacaaaatcaacaaaacaga     |
| cox1-nd2 fw / rev                  | ctgccagctctactaatgc / ccaaaacacaagtaagctca         |
| nd2-nd6 fw / rev                   | cctagctttgctccggtta / gcgcacaacaaaatagcaga         |
| L5-L7 fw / rev                     | tatgtccggcactccaaat / gccgagttcctttaacatgg         |
| L7-nd1 fw / rev                    | gcattaatgaccagggtaca / ggtgcgctcagctagagtaaa       |
| nd1-rtl fw / rev                   | tcgttacgaccaattcatgc / agtgtggaacaaatccaaaatg      |
| rtl-L8 fw / rev                    | tgctacgtacattgggttg / cgtgatcagggtactgtgt          |
| L8-S3 fw / rev                     | ttgtcatttacacggcatagc / cctccgaataattaccaacg       |
| L4-S4 fw / rev                     | tagcgaagcgaatggta / tggtatccaactgtgggtgt           |
| L1-L2b fw / rev                    | gggattgctgactgatagtc / gatgtgggctgtgagagt          |
| L4-S4 as fw / rev                  | gtagcgaagcgaatggta / cgaactttcagcaatgcaa           |
| L1-L2a as fw / rev                 | caccaatacgtgagcattcg / aaccataatgcaaaaggtacg       |
| nd1-L3 fw / rev                    | tcgttacgaccaattcatgc / agccagtaaaagtttcttagtattgga |
| RT-PCR (cob-L2b as)                |                                                    |
| cob-L2b as N1 fw / rev             | tacctactgtttgtcaaccactg / gagaggggcatcacagag       |
| cob-L2b as N2 fw / rev             | caaaccaactaatatttgcattga / aaatgttactaggacccaacg   |

Supplementary Table 1.  
Oligonucleotides used in the study.

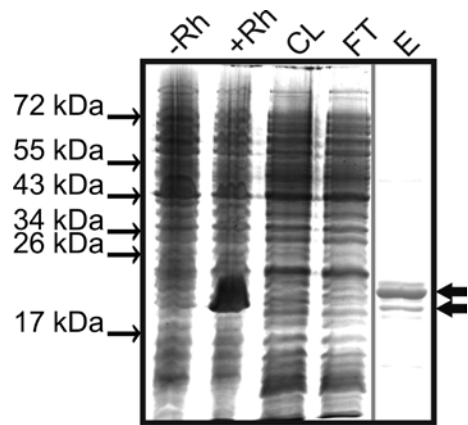

Supplementary Figure 1.

Coomassie Brilliant blue-stained 12.5% SDS-PAGE with different fractions collected during Ni-NTA purification of recombinant MOC1 (amino acids 46-255) from *E. coli* cells after induction of MOC1 expression with rhamnose (+Rh). The cleared lysate (CL) which was incubated with Ni-NTA resin is shown along with the column flow-through (FT) and pooled eluted fractions (E). Bands excised from the gel were analysed by peptide mass fingerprint. Black arrows indicate the position of MOC1.

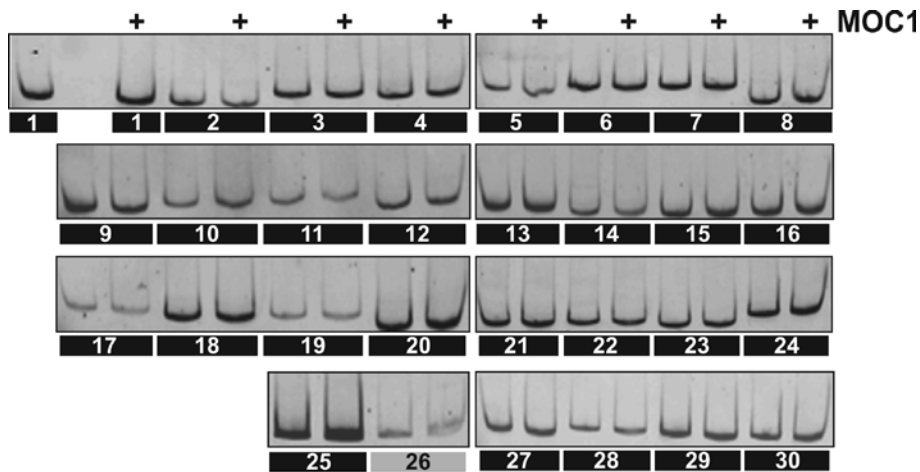

|               |                |                 |
|---------------|----------------|-----------------|
| 1: 1-542      | 11: 5216-5755  | 21: 10464-11010 |
| 2: 518-1061   | 12: 5733-6284  | 22: 10990-11530 |
| 3: 1035-1594  | 13: 6260-6799  | 23: 11500-12094 |
| 4: 1573-2125  | 14: 6780-7330  | 24: 12030-12569 |
| 5: 2104-2646  | 15: 7305-7860  | 25: 12538-13086 |
| 6: 2628-3179  | 16: 7834-8385  | 26: 13064-13604 |
| 7: 3157-3704  | 17: 8366-8910  | 27: 13582-14131 |
| 8: 3679-4226  | 18: 8891-9450  | 28: 14100-14668 |
| 9: 4203-4742  | 19: 9428-9978  | 29: 14641-15194 |
| 10: 4699-5239 | 20: 9956-10490 | 30: 15153-15758 |

Supplementary Figure 2.

EMSA-based screening of the *C. reinhardtii* mitochondrial genome to identify fragments containing MOC1 binding sites.

Upper part: EMSA results obtained with recombinant MOC1 and 30 distinct overlapping mtDNA fragments which were fluorescently labelled (Cy-3 dye). The full array of probes covered the entire mtDNA of *C. reinhardtii*. All reactions contained unspecific competitor in mass excess (40fold) relative to the probe and addition of recombinant MOC1 is indicated by ``+``.

Lower part: mtDNA regions represented by probes 1-30 relating to the publicly available mtDNA sequence of *C. reinhardtii* (NCBI Accession NC\_001638).

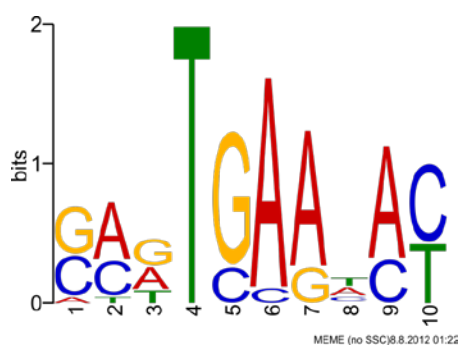

Supplementary Figure 3.

Sequence logo obtained by MEME analysis (46) of the CAST library after ten rounds of selection. Score bit values are indicated on the y-axis and the sequence position on the x-axis. Shown is the reverse complement of the motif identified by MEME. The expect value for this motif derived from 14 out of 29 sequences was 9.8 (information content 10.4 bits; relative entropy 10.2 bits).

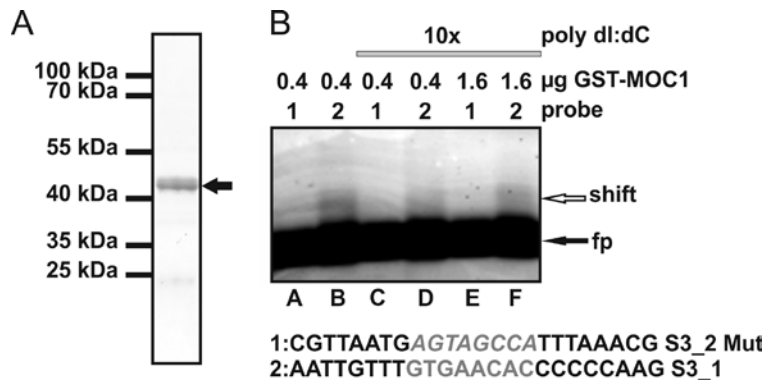

Supplementary Figure 4

A) Purified GST-MOC1 (black arrow) after SDS-PAGE separation and Coomassie Brilliant Blue staining.

B) EMSA with short fluorescent oligonucleotide probes (bottom part; sequences of S3\_2 Mut and S3\_1) and different amounts ( $\mu\text{g}$ ) of recombinant GST-MOC1 in the presence or absence of unspecific competitor (poly dl:dC) in mass excess relative to the amount of probe (10x). Numbers (upper part; probe) indicate which probe was added to the binding reaction and arrows the positions of free probe (black arrow; fp) and complexes (white arrow; shift) in the gel.

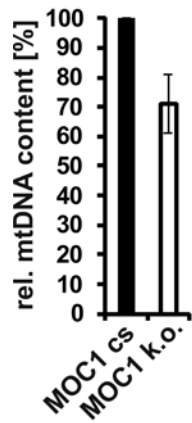

Supplementary Figure 5.

Relative mitochondrial DNA content assessed by quantitative PCR analyses. The mitochondrial *nd1* gene was used as a target gene and the nuclear gene encoding TATA-box binding protein (TBP) served as the reference gene. The mitochondrial DNA content in the MOC1-complemented strain (MOC1 cs) was set to 100%. Error bars indicate the standard deviation of two biological replicates each including three technical replicates (n=6).

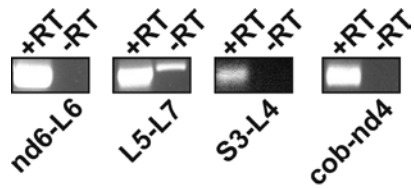

Supplementary Figure 6.

Existence of a large precursor transcript covering the entire LTU and RTU. Based on results published previously by Gray and Boer (12,13) RT-PCR was used to determine if polycistronic transcripts detected before (12,13) could result from even larger polycistronic precursors. Primers were designed to bind in two different adjacent coding sequences and samples lacking reverse transcriptase (-RT) during the cDNA synthesis step were used to rule out that contaminating mtDNA in total RNA samples served as the template for subsequent PCR amplification.



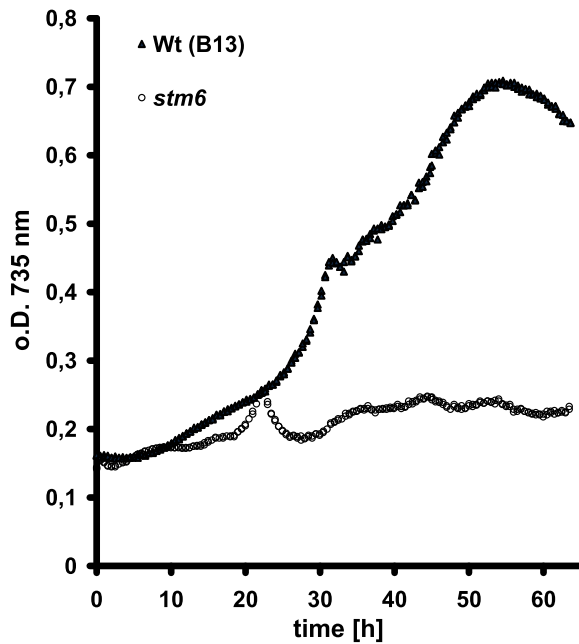

Supplementary Figure 7.

Growth of the MOC1-free mutant *stm6* and the MOC1-complemented strain B13 under strictly heterotrophic conditions. The optical density (o.D. 735 nm) was monitored during cultivation to follow the growth of both strains.

## SUPPLEMENTARY METHODS

### Production of recombinant His-MOC1 in *E. coli* for binding studies

The pellet derived from 2L of LB-Ampicillin culture was resuspended in 30 ml ice-cold sonication buffer (50 mM HEPES pH 8.0; 2 mM MgCl<sub>2</sub>; 20 mM NaCl; 25 mM imidazole; 5 mM β-mercaptoethanol; 1 mg/ml lysozyme (VWR); 3 tablets Complete Protease Inhibitor Cocktail (Roche); 15 μl Benzonase (Merck Millipore)) and cells lysed by sonication on ice. After adding NaCl to a final concentration of 1 M the lysate was incubated for 15 min on ice and subsequently cleared by centrifugation at 20,000 *g*<sub>max</sub> and 4°C for 20 min. To the cleared lysate 1.5 ml equilibrated Ni-NTA resin (Qiagen) was added and incubated for 1 h at 4°C under constant slow rotation. The resin was first washed with 20 column volumes of binding buffer (sonication buffer containing 1M NaCl) followed by 20 column volumes of wash buffer (50 mM NaH<sub>2</sub>PO<sub>4</sub> pH 8.0; 25 mM Imidazole; 300 mM NaCl; 5 mM β-mercaptoethanol) containing 1% (w/v) Triton X-100 and 10 column volumes of wash buffer supplemented with 25% (w/v) glycerol (Carl Roth). Two additional washing steps were carried out with 4 volumes of wash buffer containing 40 and 60 mM imidazole respectively prior to elution with an imidazole step gradient (100-500 mM imidazole in wash buffer). Directly after elution 2 mM EDTA (Carl Roth) and 1 mM Pefabloc<sup>®</sup> SC protease inhibitor (Carl Roth) were added to each fraction followed by pooling of protein-containing fractions and dialysis against EMSA buffer (10 mM HEPES pH 7.5; 100 mM KCl, 10% (w/v) glycerol; 5 mM β-mercaptoethanol). After dialysis and addition of 0.2 mg/ml BSA (Carl Roth) and 0.1 % (w/v) Tween20 (Carl Roth) aliquots were stored at -80°C.

### **Production of recombinant GST-MOC1 in *E. coli* for binding studies**

A pellet derived from 1L of *E. coli* culture in LB-Ampicillin was resuspended in 20 ml ice-cold sonication buffer (PBS pH 7.4; 1 mg/ml lysozyme; 15  $\mu$ l Benzonase; 2 tablets Complete Protease Inhibitor Cocktail) prior to cell lysis by sonication. The lysate was supplemented with 1mM DTT and 2 mM EDTA and subsequently centrifuged for 10 min at 20,000 x g and 4°C. After addition of Triton-X-100 to 0.1% (w/v) the cleared lysate was incubated with 1 ml glutathione-cellulose (Carl Roth) for 2h at 4°C under constant rotation. After several washing steps with PBS (+0.1% (w/v) Triton-X-100; 1 mM DTT; 2 mM EDTA) GST-MOC1 was eluted using elution buffer (100 mM Tris pH 8.0; 100 mM KCl; 1 mM DTT; 10 mM GSH). Pooled fractions were dialyzed against EMSA buffer
